# Supplementary material for: The role of iconic gestures and mouth movements in face-to-face communication
Source: PubMed Central journal article supplement (PMC9038814; doi:10.3758/s13423-021-02009-5), 2021-10-20
Supplement: 13423_2021_2009_MOESM1_ESM.pdf [file 13423_2021_2009_MOESM1_ESM.pdf]

## SUPPLEMENTARY MATERIALS

### Outliers

A-priori any analyses, four items were removed to account for the consistency within the dataset: three adjectives ('cold', 'fat', 'cold'), and a hyphenated compound noun ('merry-go-round'), leaving 116 items referring to objects (60) and actions (56) only. Outliers were further identified as: (i) any participant with an accuracy below 3SD or with RT above 3SD from the mean; (ii) any item with an accuracy below chance level (50%) or Reaction Time (RT) above 3SD from the mean; (iii) any trial with RTs greater than 3SD from the mean of all trials; (iv) any trials which had video loading issues signaled by Gorilla.

### Analysis 1

For the Congruent dataset, three items and two participants were removed due to RTs longer than 3SD from the mean; one participant was removed due to the accuracy scores below 3SD from the mean; three trials were removed due to loading issues, and 38 trials across participants and items were removed due to the RTs above 3SD from the mean. For the Incongruent dataset, two items and two participants were removed due to the RTs being above 3SD from the mean; one participant performed below 3SD from the accuracy mean; 26 trials were removed due to video loading issues and another 23 trials were removed due to RT longer than 3SD from the mean across all trials. All items were well above chance level (>65%). This left us with 50 participants and 113 items for the Congruent analysis, and 48 participants and 114 items for the Incongruent analysis.

## **Analysis 2**

The outliers were recalculated based on the combined Congruent and Incongruent datasets for the trials in which the gesture was always present. Two items and two participants were above 3SD from the mean based on the RT, and three additional participants scored below 3SD from the mean based on accuracy. Those were subsequently removed from further analysis.

Additionally, 37 trials were excluded due to being 3SD above the RT mean based on all the trials across participants. The trials with video-loading issues, as noted above, were also removed, leaving us with a total of 99 participants, 114 items, and 5608 trials to analyze.

**Full results****Analysis 1****Table 1**

*Regression results of Accuracy and Reaction Times (RTs) for the Congruent (A) and Incongruent (B) Gestures.*

A.

**MIXED-EFFECT REGRESSION RESULTS – CONGRUENT GESTURES**

| <b>Dependent variable:</b>                                | <b>Accuracy</b>                               |           |                |                    | <b>Reaction Time</b>                                           |           |           |                |                    |
|-----------------------------------------------------------|-----------------------------------------------|-----------|----------------|--------------------|----------------------------------------------------------------|-----------|-----------|----------------|--------------------|
| Model fit:                                                | Maximum likelihood<br>(Laplace Approximation) |           |                |                    | Restricted maximum likelihood<br>(Satterthwaite Approximation) |           |           |                |                    |
| Conditional R <sup>2</sup>                                | 0.134                                         |           |                |                    | 0.594                                                          |           |           |                |                    |
| <b>RANDOM EFFECTS</b>                                     |                                               |           |                |                    |                                                                |           |           |                |                    |
|                                                           | <b>Variance</b>                               | <b>SD</b> |                |                    | <b>Variance</b>                                                | <b>SD</b> |           |                |                    |
| <i>Item (Intercept)</i>                                   | 1.555                                         | 1.247     |                |                    | 0.009                                                          | 0.095     |           |                |                    |
| Gesture Presence                                          | 0.710                                         | 0.843     |                |                    | 0.003                                                          | 0.058     |           |                |                    |
| Speech Clarity                                            | 0.688                                         | 0.829     |                |                    | 0.000                                                          | 0.018     |           |                |                    |
| <i>ParticipantID (Intercept)</i>                          | 0.404                                         | 0.635     |                |                    | 0.026                                                          | 0.161     |           |                |                    |
| Gesture Presence                                          | 0.052                                         | 0.229     |                |                    | 0.000                                                          | 0.019     |           |                |                    |
| Speech Clarity                                            | 0.114                                         | 0.338     |                |                    | 0.000                                                          | 0.006     |           |                |                    |
| <b>FIXED EFFECTS</b>                                      |                                               |           |                |                    |                                                                |           |           |                |                    |
|                                                           | <b>Estimate</b>                               | <b>SE</b> | <b>z value</b> | <b>Pr(&gt; z )</b> | <b>Estimate</b>                                                | <b>SE</b> | <b>DF</b> | <b>t value</b> | <b>Pr(&gt; z )</b> |
| <i>(Intercept)</i>                                        | 4.707                                         | 0.257     | 18.312         | < 2e-16 ***        | 7.493                                                          | 0.024     | 64.220    | 303.528        | < 2e-16 ***        |
| Gesture Presence                                          | -0.389                                        | 0.190     | -2.048         | 0.040 *            | 0.031                                                          | 0.006     | 122.500   | 4.737          | 0.000 ***          |
| Speech Clarity                                            | 0.644                                         | 0.204     | 3.156          | 0.001 **           | -0.035                                                         | 0.003     | 56.460    | -11.391        | 0.000 ***          |
| Mouth Informativeness                                     | 0.841                                         | 1.246     | 0.675          | 0.499              | 0.098                                                          | 0.069     | 106.800   | 1.411          | 0.161              |
| Gesture Presence:Speech Clarity                           | -0.114                                        | 0.123     | -0.930         | 0.352              | -0.008                                                         | 0.002     | 4995.00   | -3.645         | 0.000 ***          |
| Gesture Presence:Mouth Informativeness                    | 0.771                                         | 0.969     | 0.796          | 0.426              | 0.082                                                          | 0.044     | 109.300   | 1.870          | 0.064              |
| Speech Clarity:Mouth Informativeness                      | 0.317                                         | 0.966     | 0.329          | 0.742              | 0.010                                                          | 0.022     | 103.900   | 0.481          | 0.631              |
| Gesture Presence:Speech Clarity:<br>Mouth Informativeness | 0.530                                         | 0.732     | 0.724          | 0.469              | 0.030                                                          | 0.017     | 4895.00   | 1.724          | 0.084              |
| <b>CONTROL VARIABLES</b>                                  |                                               |           |                |                    |                                                                |           |           |                |                    |
|                                                           | <b>Estimate</b>                               | <b>SE</b> | <b>z value</b> | <b>Pr(&gt; z )</b> | <b>Estimate</b>                                                | <b>SE</b> | <b>DF</b> | <b>t value</b> | <b>Pr(&gt; z )</b> |
| Age of Acquisition                                        | -0.200                                        | 0.126     | -1.588         | 0.112              | 0.013                                                          | 0.007     | 107.600   | 1.875          | 0.063              |
| Frequency                                                 | 0.011                                         | 0.240     | 0.047          | 0.962              | -0.008                                                         | 0.014     | 106.300   | -0.609         | 0.543              |
| Number of Syllables                                       | 0.233                                         | 0.329     | 0.708          | 0.479              | 0.037                                                          | 0.018     | 106.500   | 2.100          | 0.038 *            |
| Semantic Category                                         | -0.450                                        | 0.174     | -2.581         | 0.009 **           | -0.011                                                         | 0.010     | 106.600   | -1.090         | 0.278              |

*Note:* Reference levels: 'Clear' for Speech Clarity, 'Absent' for Gesture Presence, and 'Action' for Semantic Category. \*0.05; \*\*p<0.01; \*\*\*p<0.001

**B.****MIXED-EFFECT REGRESSION RESULTS – INCONGRUENT GESTURES**

| <b>Dependent variable:</b>                                | <b>Accuracy</b>                               |           | <b>Reaction Time</b>                                           |                    |                 |           |           |                |                    |
|-----------------------------------------------------------|-----------------------------------------------|-----------|----------------------------------------------------------------|--------------------|-----------------|-----------|-----------|----------------|--------------------|
| Model fit:                                                | Maximum likelihood<br>(Laplace Approximation) |           | Restricted maximum likelihood<br>(Satterthwaite Approximation) |                    |                 |           |           |                |                    |
| Conditional R <sup>2</sup>                                | 0.154                                         |           | 0.500                                                          |                    |                 |           |           |                |                    |
| <b>RANDOM EFFECTS</b>                                     |                                               |           |                                                                |                    |                 |           |           |                |                    |
|                                                           | <b>Variance</b>                               | <b>SD</b> | <b>Variance</b>                                                | <b>SD</b>          |                 |           |           |                |                    |
| <i>Item (Intercept)</i>                                   | 0.813                                         | 0.901     | 0.012                                                          | 0.109              |                 |           |           |                |                    |
| Gesture Presence                                          | n/a due to singularity                        |           | 0.005                                                          | 0.071              |                 |           |           |                |                    |
| Speech Clarity                                            | 0.063                                         | 0.251     | 0.000                                                          | 0.012              |                 |           |           |                |                    |
| <i>ParticipantID (Intercept)</i>                          | 0.753                                         | 0.868     | 0.030                                                          | 0.173              |                 |           |           |                |                    |
| Gesture Presence                                          | n/a due to singularity                        |           | n/a due to singularity                                         |                    |                 |           |           |                |                    |
| Speech Clarity                                            | 0.143                                         | 0.379     | 0.000                                                          | 0.021              |                 |           |           |                |                    |
| <b>FIXED EFFECTS</b>                                      |                                               |           |                                                                |                    |                 |           |           |                |                    |
|                                                           | <b>Estimate</b>                               | <b>SE</b> | <b>z value</b>                                                 | <b>Pr(&gt; z )</b> | <b>Estimate</b> | <b>SE</b> | <b>DF</b> | <b>t value</b> | <b>Pr(&gt; z )</b> |
| <i>(Intercept)</i>                                        | 3.454                                         | 0.194     | 17.824                                                         | < 2e-16 ***        | 7.567           | 0.027     | 61.860    | 277.558        | < 2e-16 ***        |
| Gesture Presence                                          | 0.297                                         | 0.069     | 4.322                                                          | 0.000 ***          | -0.012          | 0.007     | 110.000   | -1.685         | 0.095              |
| Speech Clarity                                            | 0.911                                         | 0.133     | 6.832                                                          | 0.000 ***          | -0.041          | 0.005     | 42.930    | -8.832         | 0.000 ***          |
| Mouth Informativeness                                     | -0.698                                        | 0.871     | -0.802                                                         | 0.432              | 0.153           | 0.081     | 107.800   | 1.871          | 0.064              |
| Gesture Presence:Speech Clarity                           | -0.046                                        | 0.068     | -0.668                                                         | 0.504              | 0.003           | 0.003     | 4677.00   | 0.808          | 0.419              |
| Gesture Presence:Mouth Informativeness                    | 0.542                                         | 0.548     | 0.989                                                          | 0.323              | 0.094           | 0.055     | 110.600   | 1.692          | 0.094              |
| Speech Clarity:Mouth Informativeness                      | 0.345                                         | 0.584     | -0.517                                                         | 0.554              | -0.034          | 0.026     | 103.900   | -1.315         | 0.191              |
| Gesture Presence:Speech Clarity:<br>Mouth Informativeness | -0.282                                        | 0.545     | -0.517                                                         | 0.605              | 0.044           | 0.025     | 4722.00   | 1.804          | 0.071              |
| <b>CONTROL VARIABLES</b>                                  |                                               |           |                                                                |                    |                 |           |           |                |                    |
|                                                           | <b>Estimate</b>                               | <b>SE</b> | <b>z value</b>                                                 | <b>Pr(&gt; z )</b> | <b>Estimate</b> | <b>SE</b> | <b>DF</b> | <b>t value</b> | <b>Pr(&gt; z )</b> |
| Age of Acquisition                                        | -0.229                                        | 0.093     | -2.456                                                         | 0.014 *            | 0.004           | 0.009     | 108.000   | 0.485          | 0.629              |
| Frequency                                                 | -0.298                                        | 0.182     | -1.634                                                         | 0.102              | -0.018          | 0.018     | 107.500   | -0.973         | 0.333              |
| Number of Syllables                                       | 0.227                                         | 0.220     | 1.031                                                          | 0.303              | 0.044           | 0.022     | 107.200   | 2.050          | 0.043 *            |
| Semantic Category                                         | -0.297                                        | 0.124     | -2.390                                                         | 0.017 *            | -0.009          | 0.012     | 107.200   | -0.734         | 0.465              |

*Note:* Reference levels: 'Clear' for Speech Clarity, 'Absent' for Gesture Presence, and 'Action' for

Semantic Category. \*0.05; \*\*p<0.01; \*\*\*p<0.001

**Analysis 2**

**Table 2**

*Regression results of Accuracy and Reaction Times (RTs) for the combined Congruent and Incongruent Gestures.*

**MIXED-EFFECT REGRESSION RESULTS – CONGRUENT & INCONGRUENT GESTURES**

| <b>Dependent variable:</b>                                   | <b>Accuracy</b>                               |           |                |                    |     | <b>Reaction Time</b>                                           |           |           |                |                    |     |
|--------------------------------------------------------------|-----------------------------------------------|-----------|----------------|--------------------|-----|----------------------------------------------------------------|-----------|-----------|----------------|--------------------|-----|
| Model fit:                                                   | Maximum likelihood<br>(Laplace Approximation) |           |                |                    |     | Restricted maximum likelihood<br>(Satterthwaite Approximation) |           |           |                |                    |     |
| Conditional R <sup>2</sup>                                   | 0.137                                         |           |                |                    |     | 0.466                                                          |           |           |                |                    |     |
| <b>RANDOM EFFECTS</b>                                        |                                               |           |                |                    |     |                                                                |           |           |                |                    |     |
|                                                              | <b>Variance</b>                               | <b>SD</b> |                |                    |     | <b>Variance</b>                                                | <b>SD</b> |           |                |                    |     |
| <i>Item (Intercept)</i>                                      | 1.299                                         | 1.401     |                |                    |     | 0.007                                                          | 0.081     |           |                |                    |     |
| Speech Clarity                                               | 0.425                                         | 0.652     |                |                    |     | 0.000                                                          | 0.011     |           |                |                    |     |
| <i>ParticipantID (Intercept)</i>                             | 0.322                                         | 0.567     |                |                    |     | 0.034                                                          | 0.184     |           |                |                    |     |
| Speech Clarity                                               | n/a due to singularity                        |           |                |                    |     | 0.000                                                          | 0.020     |           |                |                    |     |
| <b>FIXED EFFECTS</b>                                         |                                               |           |                |                    |     |                                                                |           |           |                |                    |     |
|                                                              | <b>Estimate</b>                               | <b>SE</b> | <b>z value</b> | <b>Pr(&gt; z )</b> |     | <b>Estimate</b>                                                | <b>SE</b> | <b>DF</b> | <b>z value</b> | <b>Pr(&gt; z )</b> |     |
| <i>(Intercept)</i>                                           | 3.985                                         | 0.193     | 20.682         | < 2e-16            | *** | 7.525                                                          | 0.020     | 126.50    | 370.685        | < 2e-16            | *** |
| Congruency                                                   | -0.412                                        | 0.097     | -4.234         | 0.000              | *** | 0.035                                                          | 0.019     | 96.890    | 1.834          | 0.070              |     |
| Speech Clarity                                               | 0.765                                         | 0.153     | 4.994          | 0.000              | *** | -0.032                                                         | 0.004     | 70.010    | -8.232         | 0.000              | *** |
| Mouth Informativeness                                        | -0.514                                        | 1.110     | -0.463         | 0.643              |     | 0.053                                                          | 0.062     | 103.90    | 0.859          | 0.392              |     |
| Gesture Informativeness                                      | -0.059                                        | 0.131     | -0.447         | 0.655              |     | -0.005                                                         | 0.007     | 107.00    | -0.727         | 0.469              |     |
| Congruency:Speech Clarity                                    | 0.484                                         | 0.076     | 6.369          | 0.000              | *** | -0.010                                                         | 0.004     | 94.000    | -2.800         | 0.006              | **  |
| Congruency:Mouth Informativeness                             | -1.068                                        | 0.632     | -1.690         | 0.091              |     | 0.013                                                          | 0.023     | 4898.0    | 0.557          | 0.577              |     |
| Speech Clarity:Mouth Informativeness                         | 0.675                                         | 0.859     | 0.786          | 0.432              |     | -0.066                                                         | 0.025     | 109.10    | -2.621         | 0.010              | *   |
| Congruency:Gesture Informativeness                           | 0.015                                         | 0.072     | 0.205          | 0.838              |     | 0.008                                                          | 0.003     | 4971.0    | 3.147          | 0.002              | **  |
| Speech Clarity:Gesture Informativeness                       | -0.071                                        | 0.099     | -0.724         | 0.469              |     | -0.001                                                         | 0.003     | 108.10    | -0.284         | 0.777              |     |
| Mouth Informativeness:Gesture Informativeness                | -1.099                                        | 0.919     | -1.196         | 0.232              |     | -0.068                                                         | 0.050     | 104.00    | -1.360         | 0.177              |     |
| Congruency:Speech Clarity:Mouth Informativeness              | 0.157                                         | 0.632     | 0.249          | 0.804              |     | -0.027                                                         | 0.024     | 4934.0    | -1.121         | 0.262              |     |
| Congruency:Speech Clarity:Gesture Informativeness            | 0.145                                         | 0.072     | 2.025          | 0.043              | *   | -0.001                                                         | 0.003     | 4830.0    | -0.447         | 0.655              |     |
| Congruency:Mouth Informativeness:Gesture Informativeness     | 0.386                                         | 0.483     | 0.799          | 0.424              |     | 0.033                                                          | 0.019     | 5007.0    | 1.746          | 0.081              |     |
| Speech Clarity:Mouth Informativeness:Gesture Informativeness | 0.241                                         | 0.716     | 0.336          | 0.737              |     | -0.029                                                         | 0.020     | 105.30    | -1.439         | 0.153              |     |
| <b>CONTROL VARIABLES</b>                                     |                                               |           |                |                    |     |                                                                |           |           |                |                    |     |
|                                                              | <b>Estimate</b>                               | <b>SE</b> | <b>z value</b> | <b>Pr(&gt; z )</b> |     | <b>Estimate</b>                                                | <b>SE</b> | <b>DF</b> | <b>z value</b> | <b>Pr(&gt; z )</b> |     |
| Age of Acquisition                                           | -0.278                                        | 0.104     | -2.664         | 0.008              | **  | 0.013                                                          | 0.007     | 105.10    | 1.809          | 0.073              |     |
| Frequency                                                    | -0.214                                        | 0.207     | -1.035         | 0.301              |     | 0.005                                                          | 0.014     | 104.00    | 0.345          | 0.731              |     |
| Number of Syllables                                          | 0.157                                         | 0.250     | 0.628          | 0.530              |     | 0.038                                                          | 0.017     | 103.70    | 2.269          | 0.025              | *   |
| Semantic Category                                            | -0.333                                        | 0.142     | -2.345         | 0.019              | *   | -0.004                                                         | 0.010     | 103.70    | -0.440         | 0.661              |     |

*Note:* Reference levels: 'Clear' for Speech Clarity, 'Incongruent' for Congruency, and 'Action' for Semantic Category. \*0.05; \*\*p<0.01; \*\*\*p<0.001
